# Supplementary material
Source: PubMed Central journal article supplement (PMC7652388)
Supplement: mmc1.pdf [file mmc1.pdf]

**Structure, Volume 28**

**Supplemental Information**

**The Architecture of Inactivated SARS-CoV-2**

**with Postfusion Spikes Revealed**

**by Cryo-EM and Cryo-ET**

**Chuang Liu, Luiza Mendonça, Yang Yang, Yuanzhu Gao, Chenguang Shen, Jiwei Liu, Tao Ni, Bin Ju, Congcong Liu, Xian Tang, Jinli Wei, Xiaomin Ma, Yanan Zhu, Weilong Liu, Shuman Xu, Yingxia Liu, Jing Yuan, Jing Wu, Zheng Liu, Zheng Zhang, Lei Liu, Peiyi Wang, and Peijun Zhang**

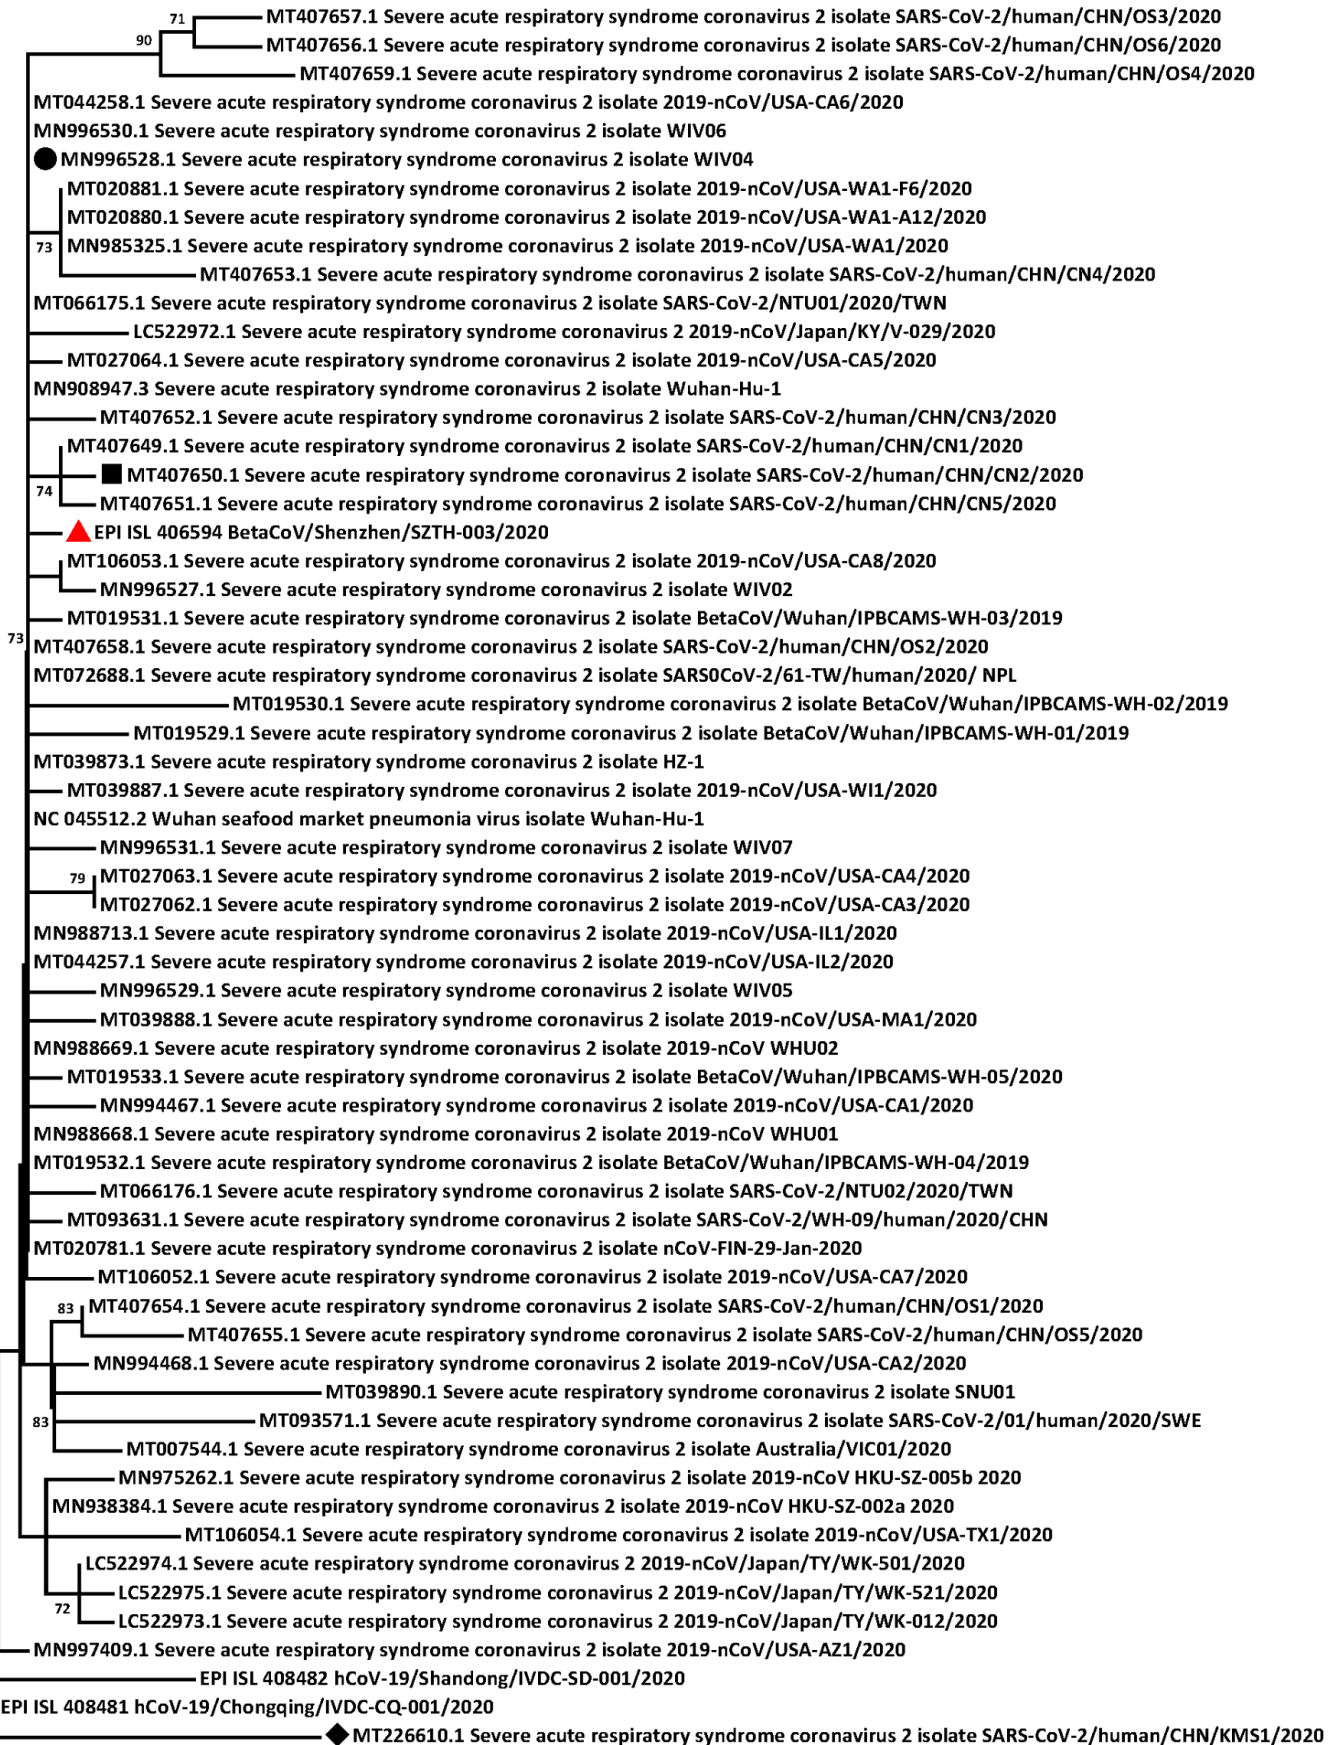

**Figure S1** | Phylogenetic characteristics of BetaCoV/Shenzhen/SZTH-003/2020. This isolate was indicated with a triangle. Red triangle, this study; Black dot, WIV04; black square, CN2; black diamond, UCC91-02. Related to Figure 1.

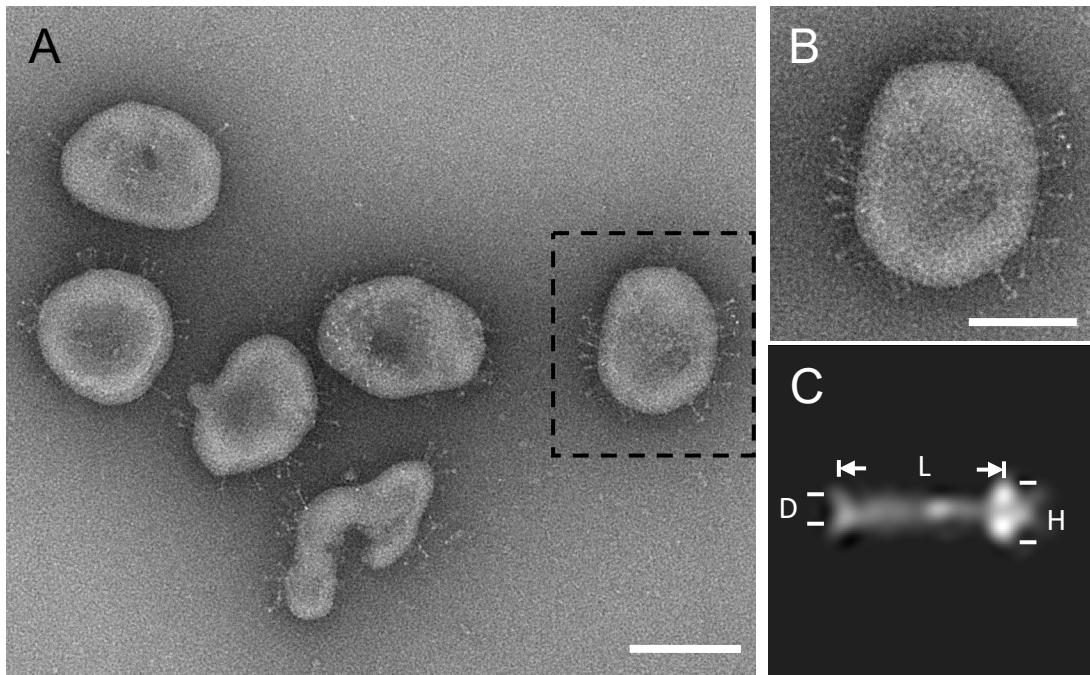

**Figure S2** | Characterization of purified SARS-CoV-2 by negative staining EM. (A) Image of negative stained SARS-CoV-2. Nail-like spikes can be clearly seen. (B) Enlarged view of virion boxed in (A). (C) Averaged 2D projection of SARS-CoV-2 nail-shaped spike (Song et al., 2018). The length (L), diameter of stem (D) and spike's head (H) are 23nm, 4nm and 7nm, respectively. Scale bars, 100 nm in A, 50 nm in B. Related to Figure 2.

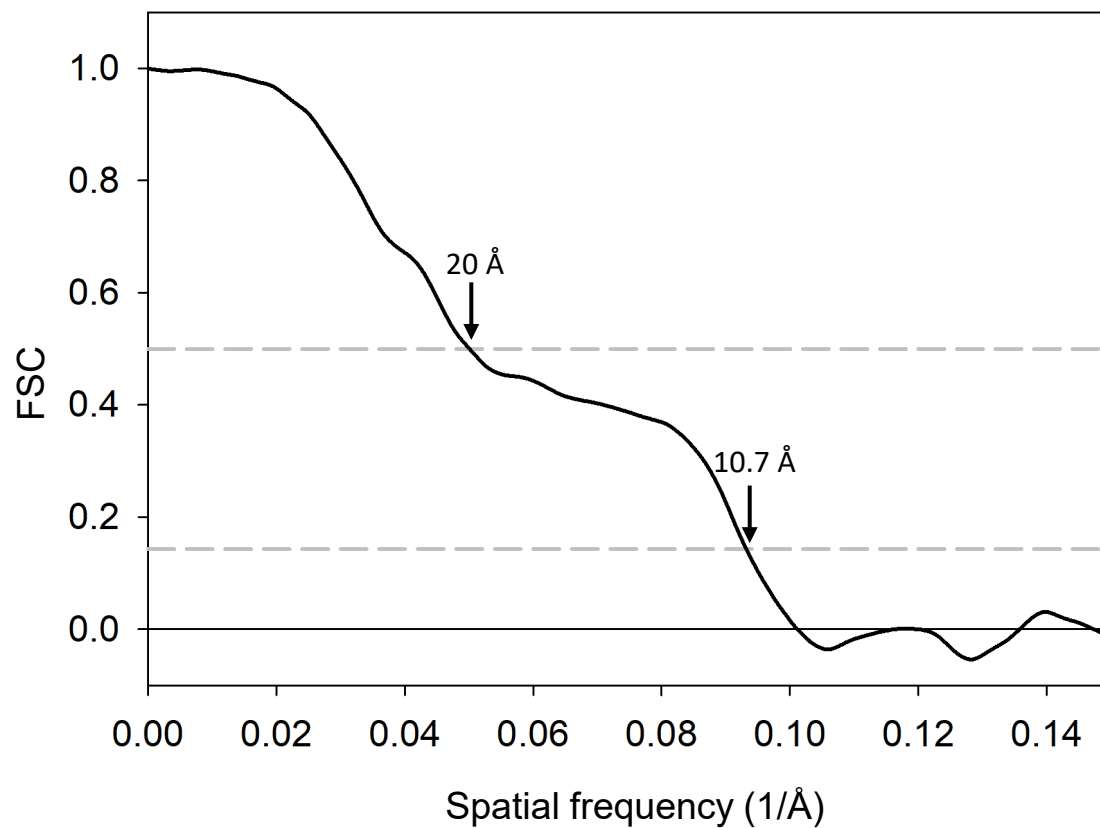

**Figure S3** | Fourier-shell-correlation (FSC) plot of postfusion spike subtomogram averaged density maps. The two dashed lines mark the FSC value of 0.5 and 0.143. The resolution is 20 Å at FSC of 0.5 and 10.7 Å at FSC of 0.143. Related to Figure 3.

| Uniprot Sequence name |                                                                                                                                                    |                                           |      |
|-----------------------|----------------------------------------------------------------------------------------------------------------------------------------------------|-------------------------------------------|------|
| P0DTC2 SPIKE_SARS2    | NNSYECDIPIGAGICASYQTQNTNSPRRAR                                                                                                                     | <b>SVASQSIIAYTMSLGAENSVAYSNN</b> IAIPT    | 716  |
| P59594 SPIKE_CVHSA    | DTSYECDIPIGAGICASYHTVSL----                                                                                                                        | LR <b>STSQKSIVAYTMSLGADSSIAYS</b> NTIAIPT | 698  |
|                       | :.*****:.*:                                                                                                                                        | **.:**.******:.*:*****:****               |      |
| P0DTC2 SPIKE_SARS2    | <b>NFTISVTT</b> EILPVSMTKTSVDC <b>TMYICGDSTEC</b> SNLLQYGSFCTQLNRAL <b>TGIAVEQDK</b>                                                               |                                           | 776  |
| P59594 SPIKE_CVHSA    | <b>FSISITTEVMPVSM</b> AKT <b>SVDCNMYICGDSTEC</b> ANLLQYGSFCTQLNRAL <b>SGIAE</b> QDR                                                                |                                           | 758  |
|                       | **:*:*:*:*:*:*:*:*:*:*:*:*:*:*:*:*:*:*:*:*:*:*:*:*:*:*:*:*:*:*:                                                                                    |                                           |      |
| P0DTC2 SPIKE_SARS2    | <b>NTQEVFAQVKQIYKTPPIKDFGGFNFSQILPDPSKPSKRSFIEDLLFNKVT</b> LADAGFIQ <b>Q</b>                                                                       |                                           | 836  |
| P59594 SPIKE_CVHSA    | <b>NTREVF</b> AQVK <b>QMYKTP</b> TLKY <b>FGGFNFSQILPDPLKPTKRSFIEDLLFNKVT</b> LADAGFM <b>Q</b>                                                      |                                           | 818  |
|                       | **:*:*:*:*:*:*:*:*:*:*:*:*:*:*:*:*:*:*:*:*:*:*:*:*:*:*:*:*:*:                                                                                      |                                           |      |
| P0DTC2 SPIKE_SARS2    | <b>YGDC</b> LGDI <b>AARDL</b> ICAQ <b>KFNGLTVL</b> PLLLT <b>DEMIAQY</b> T <b>SALLAGTITSGWTFGAGALQI</b>                                             |                                           | 896  |
| P59594 SPIKE_CVHSA    | <b>YGEC</b> LGDI <b>NARDL</b> ICAQ <b>KFNGLTVL</b> PLLLT <b>DDMIAA</b> Y <b>TAALVSGTATAGWTFGAGALQI</b>                                             |                                           | 878  |
|                       | **:*:*:*:*:*:*:*:*:*:*:*:*:*:*:*:*:*:*:*:*:*:*:*:*:*:*:*:*:*:                                                                                      |                                           |      |
| P0DTC2 SPIKE_SARS2    | <b>PFAMQ</b> MAYR <b>FNGIGV</b> TQ <b>NVL</b> YEN <b>QKLIANQ</b> F <b>NSAIGKIQD</b> SL <b>SSTASALGKLQDVVNQNA</b>                                   |                                           | 956  |
| P59594 SPIKE_CVHSA    | <b>PFAMQ</b> MAYR <b>FNGIGV</b> TQ <b>NVL</b> YEN <b>QKQIANQFNKAI</b> S <b>QIQESLTTT</b> STAL <b>GKLQDVVNQNA</b>                                   |                                           | 938  |
|                       | *****:*****:*****:*****:*****:*****:*****:*****:*****:*****:                                                                                       |                                           |      |
| P0DTC2 SPIKE_SARS2    | <b>QALNTLVKQLSSNF</b> GAISS <b>VLNDILSRLDKVEAEVQIDRLITGR</b> LQSLQTYVT <b>QQLIRAA</b>                                                              |                                           | 1016 |
| P59594 SPIKE_CVHSA    | <b>QALNTLVKQLSSNF</b> GAISS <b>VLNDILSRLDKVEAEVQIDRLITGR</b> LQSLQTYVT <b>QQLIRAA</b>                                                              |                                           | 998  |
|                       | *****:*****:*****:*****:*****:*****:*****:*****:*****:*****:                                                                                       |                                           |      |
| P0DTC2 SPIKE_SARS2    | <b>EIRAS</b> AN <b>L</b> AAT <b>KMSECVL</b> G <b>QSKRVD</b> FCG <b>KGYHLMSFPQ</b> SAP <b>HGVVFLHVTYVPAQEK</b> N <b>FT</b>                          |                                           | 1076 |
| P59594 SPIKE_CVHSA    | <b>EIRAS</b> AN <b>L</b> AAT <b>KMSECVL</b> G <b>QSKRVD</b> FCG <b>KGYHLMSFPQA</b> AP <b>HGVVFLHVTYVPSQER</b> N <b>FT</b>                          |                                           | 1058 |
|                       | *****:*****:*****:*****:*****:*****:*****:*****:*****:*****:                                                                                       |                                           |      |
| P0DTC2 SPIKE_SARS2    | <b>TAPA</b> ICH <b>D</b> GKA <b>H</b> F <b>PREGV</b> FV <b>SGTHW</b> FV <b>TQRNFYEPQIIT</b> TD <b>N</b> TFV <b>SGNCDVVIGI</b> V <b>NT</b>          |                                           | 1136 |
| P59594 SPIKE_CVHSA    | <b>TAPA</b> ICH <b>E</b> GKA <b>F</b> F <b>PREGV</b> FV <b>SGTSW</b> F <b>ITQRNF</b> F <b>SPQIIT</b> TD <b>N</b> TFV <b>SGNCDVVIGI</b> I <b>NT</b> |                                           | 1118 |
|                       | *****:***:*****:***:*****:*****:*****:*****:*****:*****:*****:                                                                                     |                                           |      |
| P0DTC2 SPIKE_SARS2    | <b>VYDPLQPELDSFKEELDKYFK</b> HT <b>SPD</b> VL <b>GD</b> IS <b>GI</b> AS <b>VVNIQKEIDRLNEVAKNL</b> ES                                               |                                           | 1196 |
| P59594 SPIKE_CVHSA    | <b>VYDPLQPELDSFKEELDKYFK</b> HT <b>SPD</b> VL <b>GD</b> IS <b>GI</b> AS <b>VVNIQKEIDRLNEVAKNL</b> ES                                               |                                           | 1178 |
|                       | *****:*****:*****:*****:*****:*****:*****:*****:*****:*****:                                                                                       |                                           |      |
| P0DTC2 SPIKE_SARS2    | <b>LIDLQELGKYEQYIKWPWYI</b> W <b>LGF</b> IA <b>GLIAIVMVTIM</b> LC <b>MTSCC</b> SL <b>CGCCSCGSCCKF</b>                                              |                                           | 1256 |
| P59594 SPIKE_CVHSA    | <b>LIDLQELGKYEQYIKWPWYV</b> W <b>LGF</b> IA <b>GLIAIVMVTI</b> LC <b>MTSCC</b> SL <b>CGACSCGSCCKF</b>                                               |                                           | 1238 |
|                       | *****:*****:*****:*****:*****:*****:*****:*****:*****:*****:                                                                                       |                                           |      |
| P0DTC2 SPIKE_SARS2    | <b>DEDDSE</b> PVL <b>KGVKL</b> H <b>Y</b> T                                                                                                        | 1273                                      |      |
| P59594 SPIKE_CVHSA    | <b>DEDDSE</b> PVL <b>KGVKL</b> H <b>Y</b> T                                                                                                        | 1255                                      |      |
|                       | *****:*****:*****:*****:*****:*****:*****:*****:*****:*****:                                                                                       |                                           |      |

**Figure S4** | Sequence alignment between SARS-CoV-2 S protein (Uniprot P0DTC2, Spike\_SARS2) and SARS-CoV S protein (Uniprot P59594, Spike\_CHHSA), shown in S2 region. Residues in bold indicate S2 residues. Residues in red indicates residues solved in PDB 6M3W. Residues highlighted in green are the glycosylation sites. Alignment done with CLUSTAL Omega (1.2.4). Related to Figure 3.

**Table S1.** Clinical information of the enrolled patient. Related to Figure 1.

| Characteristics             | Description                      |
|-----------------------------|----------------------------------|
| Age                         | 62                               |
| Gender                      | male                             |
| Disease severity            | severe                           |
| Wuhan exposure history      | Yes (Jan 1, 2020 – Jan 14, 2020) |
| Date of symptoms onset      | Jan 11, 2020                     |
| Initial symptoms            | Fever/Cough                      |
| Date of hospitalization     | Jan 15, 2020                     |
| Co-existing chronic disease | none                             |
| Influenza A virus           | -                                |
| Influenza B virus           | -                                |
| Respiratory syncytial virus | -                                |
| Human Bocavirus             | -                                |
| Adenovirus                  | -                                |
| Human metapneumovirus       | -                                |
| Rhinovirus                  | -                                |
| HCoV-229E                   | -                                |
| HCoV-OC43                   | -                                |
| HCoV-HKU1                   | -                                |
| HCoV-NL63                   | -                                |
| MERS-CoV                    | -                                |
| SARS-CoV                    | -                                |
| Interferon atomization      | Jan 16, 2020                     |
| Ribavirin                   | Jan 15, 2020                     |
| Methylprednisolone          | no                               |
| High-flow oxygen therapy    | yes                              |
| Mechanical ventilation      | No                               |
| CT finding                  | Bilateral pneumonia              |
| BALF sampling date          | Jan 21, 2020                     |
| Outcome                     | Discharged                       |

**Table S2:** Summary of data acquisition and image processing statistics.  
Related to Figure 2 and 3

| <u>Data acquisition</u>                               |                                    |
|-------------------------------------------------------|------------------------------------|
| EM equipment                                          | Titan Krios                        |
| Voltage (kV)                                          | 300                                |
| Detector                                              | Gatan K2                           |
| Energy filter                                         | Gatan GIF Quantum, 20 eV slit      |
| Super-resolution mode                                 | Yes                                |
| Pixel size (Å)                                        | 1.4                                |
| Total electron dose (e <sup>-</sup> /Å <sup>2</sup> ) | 123                                |
| Dose rate (e <sup>-</sup> /Å <sup>2</sup> /s)         | 2.55                               |
| Frame number                                          | 10                                 |
| Acquisition scheme                                    | -60/60°, 3°                        |
| Defocus range (µm)                                    | -1.5 to -5.0                       |
| Number of tilt-series                                 | 383                                |
| Software                                              | SerialEM                           |
| <u>Data processing</u>                                |                                    |
| Number of tomograms                                   | 242                                |
| Number of subtomograms                                | 956                                |
| Symmetry imposed                                      | C3                                 |
| Final resolution (Å)                                  | 20 Å at 0.5FSC, 10.7 Å at 0.143FSC |
| Software                                              | IMOD/emClarity/Dynamo              |
| EMDB number                                           | EMD-11627                          |

**Table S3.** Comparison of inactivated viruses from four vaccine candidates with this study. Related to Figure 2 and 3.

| Vaccine Name | Developer                                                                                    | Type of Vaccine        | Vaccine strain | EM images                                                               | reference                 |
|--------------|----------------------------------------------------------------------------------------------|------------------------|----------------|-------------------------------------------------------------------------|---------------------------|
| PiCoVacc     | Sinovac                                                                                      | $\beta$ -propiolactone | CN2            | CryoEM, most postfusion Spikes                                          | Gao et al, Science 2020   |
| N/A          | Wuhan Institute of Biological Products/ Sinopharm                                            | $\beta$ -propiolactone | WIV04          | NO EM image                                                             | Xia et al. JAMA 2020      |
| BBIBP-CorV   | Beijing Institute of Biological Products/ Sinopharm                                          | $\beta$ -propiolactone | HB02           | Negative stain most prefusion Spikes                                    | Wang et al. Cell 2020     |
| N/A          | Institute of Medical Biology, Chinese Academy of Medical Sciences                            | formaldehyde           | UCC91-02       | Negative stain, both prefusion and post fusion                          | Chen et al., BioRxiv 2020 |
| N/A          | Institute for Hepatology, National Clinical Research Center for Infectious Disease, Shenzhen | $\beta$ -propiolactone | SZTH-003       | Negative stain and cryoEM/ET, both prefusion (26%) and postfusion (74%) | This study                |
